# Supplementary material
Source: Springer Nature journal article supplement (https://www.springermedizin.de/resource/supplementary/12947_2013_482_MOESM2_ESM.pdf/9555846)

**A**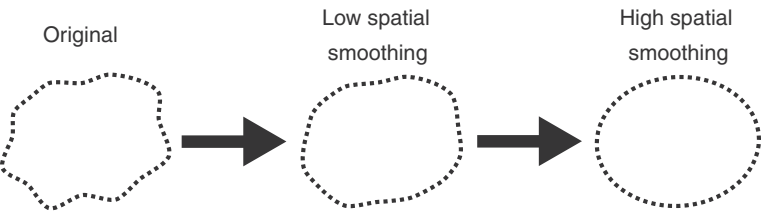**B**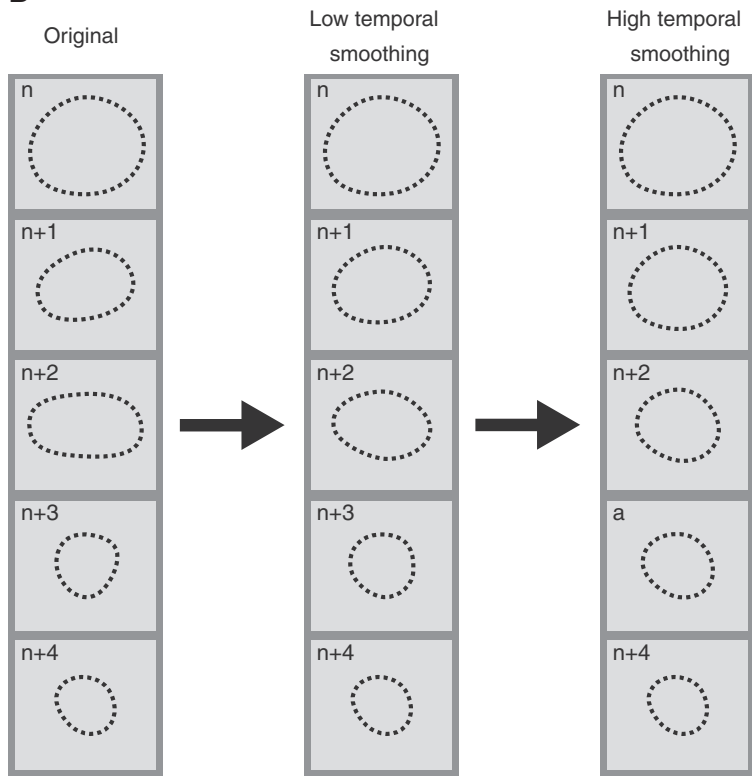

Supplement: MOESM2 [file 9555846]
